# Supplementary material for: Construction of MOF-shell porous materials and performance studies in the selective adsorption and separation of benzene pollutants
Source: Royal Society of Chemistry journal article supplement (doi:10.1039/d1dt01205c), 2021-01-01
Supplement: d1dt01205c2.pdf [file d1dt01205c2.pdf]

## Electronic Supporting Information

### Construction of MOFs-shell Porous Materials and Performance Study in Selective Adsorption and Separation of Benzene Pollutants

Yu Qiao,<sup>a,c</sup> Na Lv,<sup>a,c</sup> Dong Li,<sup>b</sup> Hongji Li,<sup>a,d</sup> Xiangxin Xue,<sup>a,c</sup> Wei Jiang,<sup>a,d</sup> Zhanlin  
Xu,<sup>\*a,c</sup> Guangbo Che<sup>\*a</sup>

<sup>a</sup> Key Laboratory of Preparation and Application of Environmental Friendly Materials (Jilin Normal University), Ministry of Education, Changchun 130103, P. R. China

<sup>b</sup> School of Materials Science and Engineering, Liaoning Technical University, Fuxin 123000, P. R. China

<sup>c</sup> College of Chemistry, Jilin Normal University, Siping 136000, PR China

<sup>d</sup> College of Environmental Science and Engineering, Jilin Normal University, Siping 136000, PR China

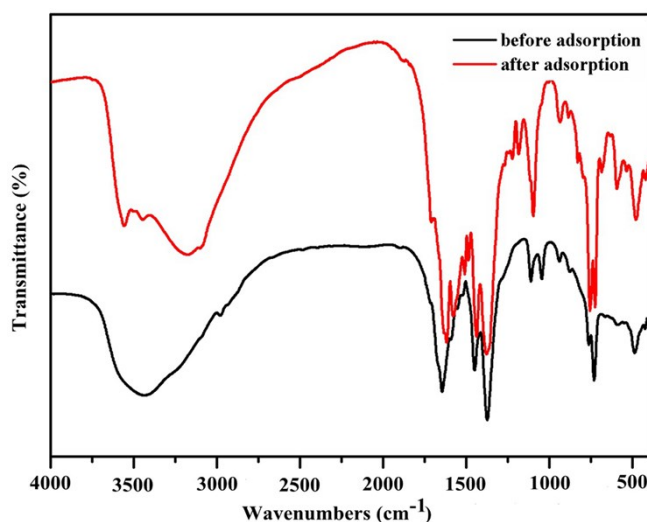

**Fig. S1** FT-IR spectras of HKUST-1 shell before and after nitrobenzene adsorption.

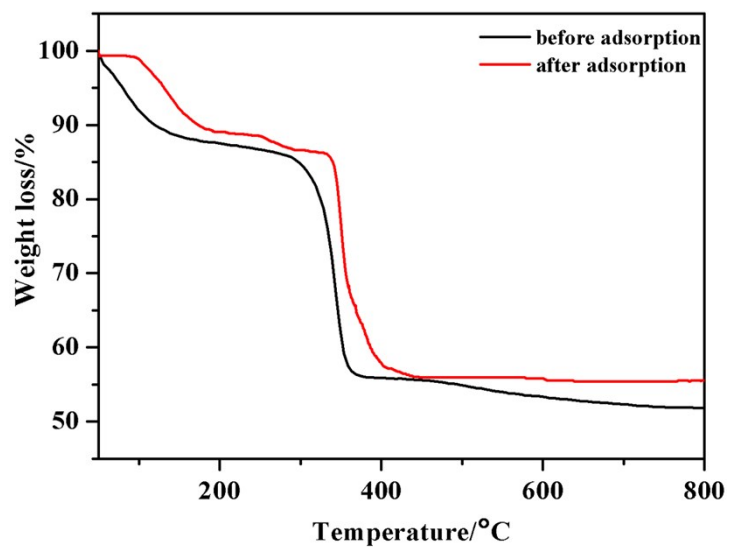

**Fig. S2** TG curves of HKUST-1 shell before and after nitrobenzene adsorption.

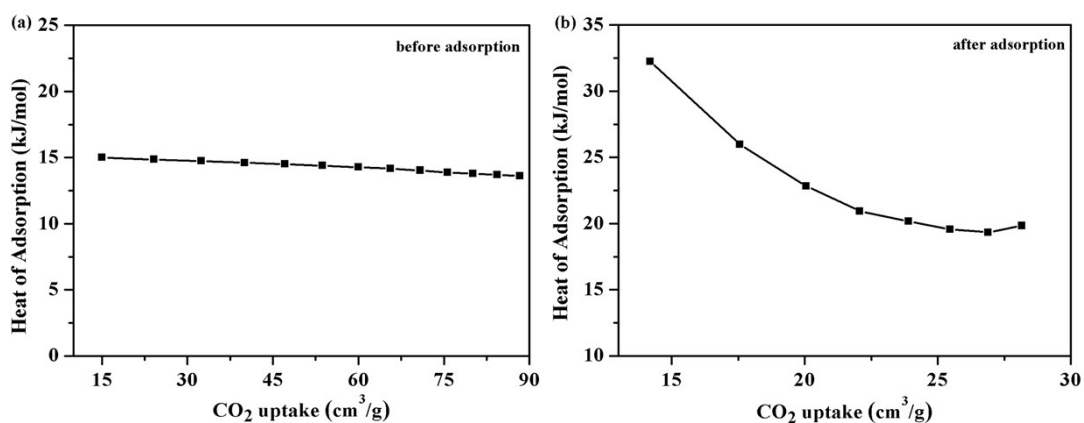

**Fig. S3.** CO<sub>2</sub> isosteric heat of before and after nitrobenzene adsorption of HKUST-1 shell.

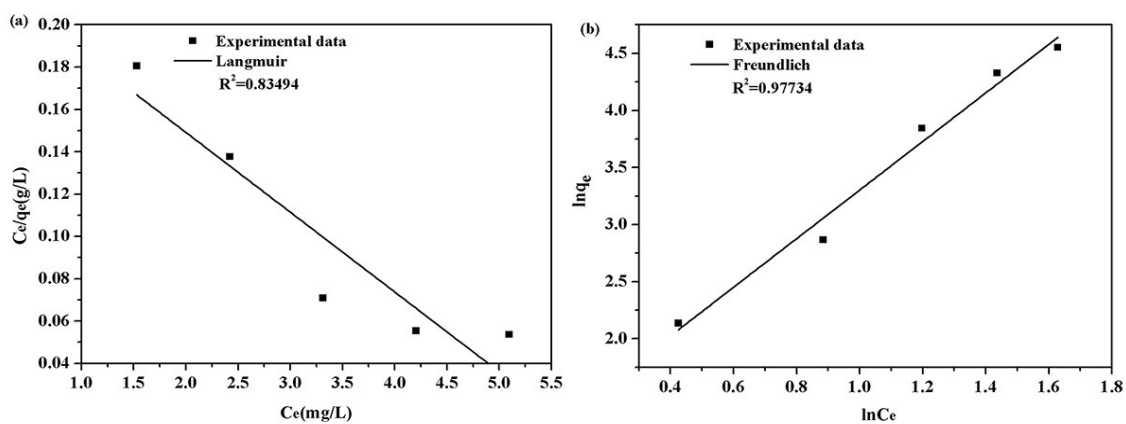

**Fig. S4** The adsorption isotherms of nitrobenzene on HKUST-1 shell: (a) Langmuir model and (b) Freundlich model.

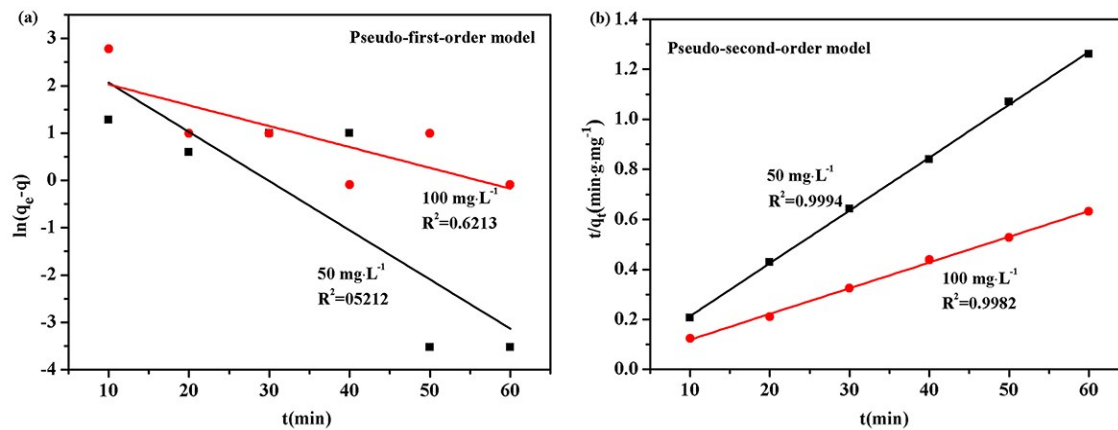

**Fig. S5** The fitting of adsorption kinetics of NB by HKUST-1 shell: (a) pseudo-first-order kinetics model; (b) pseudo-second-order kinetics model.

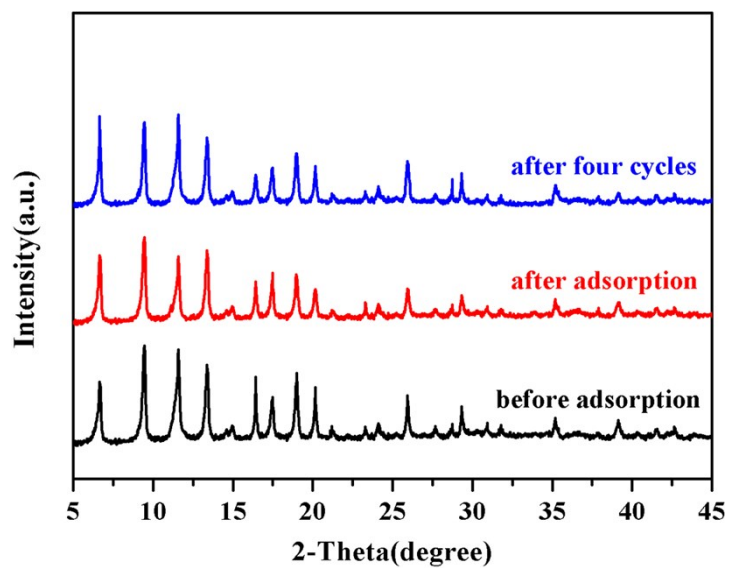

**Fig. S6** PXRD spectrum of HKUST-1 shell after four cycles.
